# Supplementary material
Source: Springer Nature journal article supplement (https://www.springermedizin.de/resource/supplementary/12889_2007_1172_MOESM2_ESM.pdf/9502612)
Supplement: MOESM2 [file 9502612]

30 areas selected in Salvador City

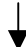

## ORIGINAL COHORT, DEFINED FOR THE STUDY OF DIARRHOEA

**1,156 children** recruited in 1997

Demographic environmental and socioeconomic data was collected at baseline. Intensive follow-up for 16 months when nutritional status, intestinal parasitic infections, and diarrhea occurrence was assessed

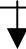

## SUBSAMPLE OF ORIGINAL COHORT FOR COGNITION STUDY

451 had HOME inventory  
of which...

*79 refused to continue or  
were lost*

*7 were  
excluded*

365 had Bayley scale  
of which...

*19 refused to continue or  
were lost*

346 had WPPSI-R  
(and all the other measurements)
